# Supplementary material for: Identification of two-histidines one-carboxylate binding motifs in proteins amenable to facial coordination to metals
Source: Royal Society of Chemistry journal article supplement (doi:10.1039/c2mt20010d), 2012-01-01
Supplement: c2mt20010d_2.csv [file c2mt20010d_2.csv]

putative: metalloproteins in apo form
poor: unlikely metal binding sites
viable: potential metal binding site
PDB	classification	residue1	residue2	residue3	PROTEIN NAME
1DIE	1_putative	ASP 244	HIS 290	HIS 242	D-XYLOSE ISOMERASE
1DXI	1_putative	ASP 245	HIS 285	HIS 243	GLUCOSE ISOMERASE
1CLK	1_putative	ASP 244	HIS 284	HIS 242	XYLOSE ISOMERASE
1BXB	1_putative	ASP 244	HIS 284	HIS 242	XYLOSE ISOMERASE
3CT7	1_putative	ASP 32	HIS 63	HIS 30	D-ALLULOSE 6-PHOSPHATE 3-EPIMERASE
2PNK	1_putative	ASP 355	HIS 28	HIS 26	URONATE ISOMERASE
1JC4	1_putative	GLU 141	HIS 91	HIS 12	METHYLMALONYL-COA EPIMERASE
3IAC	1_putative	ASP 414	HIS 35	HIS 33	GLUCURONATE ISOMERASE
1J5S	1_putative	ASP 397	HIS 32	HIS 30	URONATE ISOMERASE
1RPX	1_putative	ASP 43	HIS 74	HIS 41	D-RIBULOSE-5-PHOSPHATE 3-EPIMERASE
3L2H	1_putative	GLU 69	HIS 62	HIS 104	SUGAR PHOSPHATE ISOMERASE
1H1Y	1_putative	ASP 38	HIS 69	HIS 36	D-RIBULOSE-5-PHOSPHATE 3-EPIMERASE
3DFH	1_putative	GLU 259	HIS 282	HIS 309	PUTATIVE MANDELATE RACEMASE
2OVL	1_putative	GLU 319	HIS 299	HIS 321	RACEMASE
3INP	1_putative	ASP 36	HIS 68	HIS 34	D-RIBULOSE- 2 PHOSPHATE 3-EPIMERASE
1X8E	1_putative	GLU 97	HIS 90	HIS 88	PHOSPHOGLUCOSE 2 ISOMERASE
2Q01	1_putative	ASP 416	HIS 41	HIS 39	GLUCURONATE ISOMERASE
2AJT	1_putative	GLU 306	HIS 450	HIS 350	L-ARABINOSE ISOMERASE
3DJB	1_putative	ASP 59	HIS 58	HIS 29	HD-SUPERFAMILY HYDROLASE
2G47	1_putative	GLU 189	HIS 108	HIS 112	INSULIN-DEGRADING ENZYME
3BE7	1_putative	ASP 315	HIS 64	HIS 62	ZN-DEPENDENT ARGININE CARBOXYPEPTIDASE
2DHR	1_putative	ASP 493	HIS 422	HIS 418	ATP-DEPENDENT METALLOPROTEASE 2 FTSH
1K9X	1_putative	GLU 299	HIS 273	HIS 269	CARBOXYPEPTIDASE APO-YB
2ODF	1_putative	ASP 59	HIS 154	HIS 33	N-formylglutamate amidohydrolase
2IVN	1_putative	ASP 285	HIS 111	HIS 107	UP1 PROTEIN
3FMC	1_putative	GLU 45	HIS 171	HIS 42	PUTATIVE SUCCINYLGLUTAMATE DESUCCINYLASE
2IES	1_putative	ASP 242	HIS 79	HIS 238	N-acetylglucosamine deacetylase
2PGS	1_putative	ASP 110	HIS 109	HIS 66	PUTATIVE DEOXYGUANOSINETRIPHOSPHATE 2 TRIPHOSPHOHYDROLASE
1YNB	1_putative	ASP 75	HIS 74	HIS 42	putative phosphohydrolase
3IUK	1_putative	GLU 420	HIS 391	HIS 385	M32 CARBOXYPEPTIDASES
2QVP	1_putative	GLU 77	HIS 168	HIS 74	PUTATIVE METALLOPEPTIDASE
1XSQ	1_putative	GLU 72	HIS 74	HIS 124	UREIDOGLYCOLATE HYDROLASE
2QS8	1_putative	ASP 328	HIS 69	HIS 71	XAA-PRO DIPEPTIDASE
3EOQ	1_putative	GLU 125	HIS 46	HIS 50	PUTATIVE ZINC PROTEASE BETA- 2 SUBUNIT
3L2N	1_putative	GLU 169	HIS 259	HIS 166	PUTATIVE CARBOXYPEPTIDASE A
2FFI	1_putative	ASP 236	HIS 18	HIS 20	PUTATIVE 2-PYRONE-4,6-DICARBOXYLIC 2 ACID HYDROLASE
3ESH	1_putative	ASP 112	HIS 113	HIS 251	PROBABLE METAL-DEPENDENT HYDROLASE
2ZNV	1_putative	ASP 360	HIS 347	HIS 349	AMSH-LP DUB DOMAIN
2BDR	1_putative	GLU 74	HIS 76	HIS 126	PUTATIVE UREIDOGLYCOLATE HYDROLASE
1IOI	1_putative	GLU 79	HIS 166	HIS 66	PYRROLIDONE CARBOXYL 2 PEPTIDASE
3KH1	1_putative	ASP 75	HIS 74	HIS 43	METAL-DEPENDENT 2 PHOSPHOHYDROLASE
1V3Y	1_putative	GLU 146	HIS 145	HIS 149	PEPTIDE DEFORMYLASE
1LME	1_putative	GLU 130	HIS 129	HIS 133	PEPTIDE DEFORMYLASE
3IGH	1_putative	ASP 487	HIS 499	HIS 500	UNCHARACTERIZED METAL-DEPENDENT 2 HYDROLASE
3LNP	1_putative	ASP 331	HIS 90	HIS 88	AMIDOHYDROLASE
2NSM	1_putative	GLU 69	HIS 196	HIS 66	CARBOXYPEPTIDASE N
3K2K	1_putative	GLU 174	HIS 268	HIS 171	PUTATIVE CARBOXYPEPTIDASE
1ARL	1_putative	GLU 72	HIS 196	HIS 69	CARBOXYPEPTIDASE
3CMN	1_putative	GLU 211	HIS 210	HIS 214	PUTATIVE HYDROLASE
2QVN	1_putative	ASP 310	HIS 44	HIS 42	ADENOSINE DEAMINASE
2G9D	1_putative	GLU 66	HIS 155	HIS 63	SUCCINYLGLUTAMATE DESUCCINYLASE
3NA6	1_putative	GLU 61	HIS 144	HIS 58	SUCCINYLGLUTAMATE DESUCCINYLASE
1OIH	1_putative	ASP 110	HIS 264	HIS 108	ALKYLSULFATASE ATSK
1OTJ	1_putative	ASP 101	HIS 255	HIS 99	TAURINE HYRDOXYLASE
1E5R	1_putative	ASP 109	HIS 158	HIS 107	PROLINE 3-HYDROXYLASE
3ITQ	1_putative	ASP 129	HIS 193	HIS 127	PROLYL 4-HYDROXYLASE
3N6W	1_putative	ASP 204	HIS 347	HIS 202	GAMMA-BUTYROBETAINE HYDROXYLASE
2OG5	1_putative	GLU 157	HIS 287	HIS 155	ASPARAGINE OXYGENASE
3DXT	1_putative	GLU 194	HIS 280	HIS 192	CATALYTIC CORE DOMAIN OF JMJD2D
2Q14	1_putative	ASP 96	HIS 95	HIS 58	PHOSPHOHYDROLASE
2DQB	1_putative	ASP 109	HIS 108	HIS 79	DNTP TRIPHOSPHOHYDROLASE
3DYQ	1_putative	ASP 293	HIS 292	HIS 256	PHOSPHODIESTRASE 9
3IRH	1_putative	ASP 111	HIS 110	HIS 66	HD-DOMAIN PROTEIN
1SO2	1_putative	ASP 822	HIS 821	HIS 741	PHOSPHODIESTERASE 3B
3BG2	1_putative	ASP 117	HIS 116	HIS 68	dGTP TRIPHOSPHOHYDROLASE
3DPC	1_putative	ASP 51	HIS 370	HIS 372	ALKALINE PHOSPHATASE
2PAQ	1_putative	ASP 69	HIS 68	HIS 33	5'-DEOXYNUCLEOTIDASE YFBR
3MZO	1_putative	ASP 68	HIS 67	HIS 33	PHOSPHOHYDROLASE (LIN2634)
1AJA	1_putative	ASP 51	HIS 370	HIS 372	ALKALINE PHOSPHATASE
"2E67"	1_putative	ASP 125	HIS 18	HIS 60	HYPOTHETICAL PROTEIN TTHB029
3KB4	1_putative	ASP 121	HIS 120	HIS 124	PUTATIVE PROTEIN
3LP5	1_putative	ASP 128	HIS 126	HIS 98	PUTATIVE CELL SURFACE HYDROLASE 2
1K4N	1_putative	GLU 101	HIS 46	HIS 117	PUTATIVE OXYGENASE
2PJQ	1_putative	ASP 59	HIS 58	HIS 29	PUTATIVE PROTEIN
2CW6	1_putative	ASP 42	HIS 233	HIS 235	HMG-COA LYASE
3GN6	1_putative	GLU 308	HIS 282	HIS 286	PUTATIVE PROTEIN
3CDX	1_putative	GLU 65	HIS 148	HIS 62	SUCCINYLGLUTAMATEDESUCCINYLASE
3AL5	1_putative	ASP 162	HIS 235	HIS 160	HUMAN TYW5
1YDO	1_putative	ASP 16	HIS 207	HIS 209	HMG-COA LYASE
2FLF	1_putative	GLU 70	HIS 88	HIS 151	L-FUCULOSE-1-PHOSPHATE ALDOLASE
3BZG	1_putative	GLU 175	HIS 231	HIS 203	ENDONUCLEASE
2QR4	1_putative	GLU 419	HIS 395	HIS 391	OLIGOENDOPEPTIDASE-F
1A5K	1_putative	ASP 360	HIS 134	HIS 136	AEROGENES UREASE
3HOA	1_putative	GLU 277	HIS 276	HIS 280	M32 2 CARBOXYPEPTIDASE
3MVT	1_putative	ASP 295	HIS 17	HIS 15	ADENOSINE DEAMINASE
2V28	1_putative	GLU 123	HIS 122	HIS 127	PHENYLALANINE HYDROXYLASE 2
2JIJ	1_putative	ASP 145	HIS 227	HIS 143	PROLYL-4 HYDROXYLASE TYPE I
2ZYF	1_putative	GLU 13	HIS 195	HIS 197	HOMOCITRATE SYNTHASE
3IUZ	1_putative	GLU 303	HIS 237	HIS 81	GLYOXALASE SUPERFAMILY PROTEIN 2
1DS0	1_putative	GLU 146	HIS 279	HIS 144	CLAVAMINATE SYNTHASE
1W9Y	1_putative	ASP 179	HIS 234	HIS 177	ACC OXIDASE
3FB0	1_putative	GLU 166	HIS 146	HIS 142	THERMOLYSIN
2OPW	1_putative	ASP 158	HIS 246	HIS 156	PHYTANOYL-COA DIOXYGENASE
3DL1	1_putative	GLU 212	HIS 153	HIS 149	METAL-DEPENDENT HYDROLASE
2HRS	1_putative	GLU 222	HIS 224	HIS 42	GREEN FLUORECENCE PROTEIN
1IAD	1_putative	GLU 93	HIS 92	HIS 96	ZINC-ENDOPEPTIDASE
3BOK	1_putative	GLU 262	HIS 227	HIS 223	BOTULINUM NEUROTOXIN
3C5V	1_putative	GLU 353	HIS 352	HIS 349	PP2A-SPECIFIC METHYLESTERASE
1LTU	1_putative	GLU 184	HIS 143	HIS 138	Fe DEPENDENT PHENYLALANINE HYDROXYLASE
2CBE	1_putative	GLU 117	HIS 119	HIS 96	CARBONIC ANHYDRASE II
1S0B	1_putative	GLU 230	HIS 229	HIS 233	BOTULINUM NEUROTOXIN
2V8I	1_putative	GLU 130	HIS 172	HIS 109	PECTATE LYASE
3EN9	1_putative	ASP 284	HIS 110	HIS 106	O-sialoglycoprotein endopeptidase/protein kinase
2G7K	1_putative	GLU 261	HIS 226	HIS 222	BOTULINUM NEUROTOXIN, light chain
1ZL5	1_putative	GLU 250	HIS 215	HIS 211	BOTULINUM NEUROTOXIN E, catalytic domain
3ENO	1_putative	ASP 285	HIS 111	HIS 107	PCC1
3B2R	1_putative	ASP 654	HIS 653	HIS 617	PDE5A1 CATALYTIC DOMAIN
1DCS	1_putative	ASP 185	HIS 243	HIS 183	DEACETOXYCEPHALOSPORIN C SYNTHASE
2QAH	1_putative	ASP 248	HIS 31	HIS 33	2-PYRONE-4,6-DICARBOXYLIC ACID 2 HYDROLASE
3DTE	1_putative	GLU 113	HIS 86	HIS 82	IRRE PROTEIN
3EAT	1_putative	ASP 112	HIS 259	HIS 110	PVCB (PA2255) PROTEIN
1J6O	1_putative	ASP 201	HIS 4	HIS 6	TATD-RELATED DEOXYRIBONUCLEASE 2
3BTX	1_putative	ASP 173	HIS 236	HIS 171	HUMAN ABH2 BOUND TO DSDNA
1ILW	1_putative	ASP 52	HIS 54	HIS 71	PYRAZINAMIDASE/NICOTINAMIDASE
2Z8O	1_putative	ASP 84	HIS 81	HIS 88	PHOSPHOTHREONINE LYASE
2VJU	1_putative	ASP 61	HIS 66	HIS 64	IS608 TRANSPOSASE
3A5Q	1_putative	GLU 248	HIS 250	HIS 259	BENZALACETONE SYNTHASE
1C3P	1_putative	ASP 168	HIS 131	HIS 132	HDAC HOMOLOG
2WBQ	1_putative	GLU 170	HIS 316	HIS 168	VIOC
1GP4	1_putative	ASP 234	HIS 288	HIS 232	ANTHOCYANIDIN SYNTHASE
1IZ3	1_putative	ASP 201	HIS 199	HIS 279	DIMERIC STRUCTURE OF FIH
1YW6	1_putative	GLU 56	HIS 147	HIS 53	SUCCINYLGLUTAMATE DESUCCINYLASE
1W28	1_putative	ASP 185	HIS 243	HIS 183	DEACETOXYCEPHALOSPORIN C SYNTHASE
3H8O	1_putative	ASP 173	HIS 236	HIS 171	N1-MEA AND N3-MEC 2
2OUR	1_putative	ASP 564	HIS 563	HIS 529	PHOSPHODIESTERASE 10
2XLF	1_putative	GLU 95	HIS 149	HIS 90	PERIPLASM CUPRO-PROTEIN
1JKY	1_putative	GLU 687	HIS 686	HIS 690	ANTHRAX LETHAL FACTOR
2DBI	1_putative	ASP 205	HIS 345	HIS 203	HYPOTHETICAL PROTEIN
2KKS	1_putative	ASP 94	HIS 81	HIS 83	PROTEIN DSY2949
1XK4	1_putative	GLU 92	HIS 91	HIS 95	HUMAN CALPROTECTIN
2DVW	2_poor	ASP 136	HIS 111	HIS 144	ONCOPROTEIN GANKYRIN
1YYH	2_poor	ASP 87	HIS 62	HIS 95	NOTCH 1 ANKYRIN DOMAIN
1MJ0	2_poor	ASP 77	HIS 52	HIS 85	ARTIFICIAL ANKYRIN REPEAT PROTEIN
1TR4	2_poor	ASP 70	HIS 45	HIS 78	ONCOGENIC PROTEIN GANKYRIN
2F8Y	2_poor	ASP 1959	HIS 1934	HIS 1967	NOTCH1 ANKYRIN REPEATS
2QC9	2_poor	ASP 1948	HIS 1923	HIS 1956	NOTCH 1 ANKYRIN REPEAT
2V5Q	2_poor	ASP 77	HIS 52	HIS 85	PLK-1 KINASE
2V4H	2_poor	ASP 77	HIS 52	HIS 85	1D5 DARPIN COMPLEX
1N0Q	2_poor	ASP 65	HIS 40	HIS 73	ANKYRIN REPEAT PROTEIN
1IXV	2_poor	ASP 33	HIS 7	HIS 41	GANKYRIN
1QYM	2_poor	ASP 136	HIS 111	HIS 144	GANKYRIN
3HG0	2_poor	ASP 77	HIS 52	HIS 85	DARPIN
1N0R	2_poor	ASP 65	HIS 40	HIS 73	DESIGNED ANKYRIN
2ZGD	2_poor	ASP 87	HIS 62	HIS 8	ANKYRIN REPEAT PROTEIN
1IHB	2_poor	ASP 100	HIS 75	HIS 108	P18-INK4C(INK6)
1JCT	2_poor	ASP 105	HIS 315	HIS 111	GLUCARATE DEHYDRATASE
2G8Y	2_poor	GLU 96	HIS 95	HIS 70	MALATE/LACTATE DEHYDROGENASE 2
1YB1	2_poor	GLU 32	HIS 161	HIS 159	HYDROXYSTEROID DEHYDROGENASE
2W54	2_poor	GLU 358	HIS 359	HIS 744	XANTHINE DEHYDROGENASE
2UXW	2_poor	GLU 599	HIS 598	HIS 593	ACYL-COA 2 DEHYDROGENASE
3ENK	2_poor	ASP 327	HIS 328	HIS 238	UDP-GLUCOSE 4-EPIMERASE
1VRG	2_poor	GLU 137	HIS 106	HIS 59	PROPIONYL-COA CARBOXYLASE
1RQ5	2_poor	ASP 767	HIS 787	HIS 737	CELLOBIOHYDROLASE CBHA
3IU0	2_poor	GLU 74	HIS 335	HIS 320	TRANSGLUTAMINASE
2X36	2_poor	GLU 801	HIS 839	HIS 841	MITOCHONDRIAL LON PROTEASE
2IJZ	2_poor	ASP 411	HIS 410	HIS 414	AMINOPEPTIDASE
2FUG	2_poor	ASP 406	HIS 93	HIS 89	HYDROPHILIC DOMAIN OF RESP. COMPLEX I
1TI2	2_poor	ASP 218	HIS 254	HIS 251	PYROGALLOL-PHLOROGLUCINOL 2
2VVL	2_poor	GLU 344	HIS 378	HIS 342	MAO-N-D3
1CDG	2_poor	ASP 229	HIS 140	HIS 233	CYCLODEXTRIN 2 GLYCOSYLTRANSFERASE
1KKU	2_poor	ASP 83	HIS 102	HIS 101	NAD+ ADENYLYLTRANSFERASE
1A47	2_poor	ASP 230	HIS 141	HIS 234	CGTASE
1HVU	2_poor	GLU 233	HIS 235	HIS 315	HIV REVERSE TRANSCRIPTASE 2
3H37	2_poor	GLU 317	HIS 315	HIS 350	CCA-ADDING ENZYME
2XRF	2_poor	ASP 38	HIS 134	HIS 133	URIDINE PHOSPHORYLASE 2
2RGR	2_poor	ASP 530	HIS 529	HIS 533	TOPOISOMERASE IIA
3BQK	2_poor	ASP 1335	HIS 1315	HIS 1345	SULPHATE BINDING DBL3X
1BU9	2_poor	ASP 100	HIS 108	HIS 75	P18-INK4C
2I6E	2_poor	ASP 156	HIS 23	HIS 241	UNKNOWN FUNCTION
1VK5	2_poor	GLU 124	HIS 127	HIS 83	UNKNOWN FUNCTION
1T3U	2_poor	ASP 65	HIS 64	HIS 68	UNKNOWN FUNCTION
2GZ4	2_poor	ASP 86	HIS 85	HIS 59	UNKNOWN FUNCTION
1ZYL	2_poor	ASP 220	HIS 199	HIS 203	UNKNOWN FUNCTION
3FJV	2_poor	GLU 21	HIS 22	HIS 55	UNKNOWN FUNCTION
2EJQ	2_poor	GLU 96	HIS 95	HIS 99	UNKNOWN FUNCTION
2HEQ	2_poor	ASP 57	HIS 31	HIS 30	PROTEIN YORP
2A7Y	2_poor	GLU 63	HIS 19	HIS 22	UNKNOWN FUNCTION
1ZPD	2_poor	ASP 120	HIS 106	HIS 122	PYRUVATE DECARBOXYLASE
1FTR	2_poor	ASP 10	HIS 291	HIS 293	FORMYLTRANSFERASE
1B70	2_poor	GLU 672	HIS 584	HIS 547	PHENYLALANYL TRNA SYNTHETASE
1GWX	2_poor	ASP 383	HIS 425	HIS 420	PEROXISOME
1BL9	2_poor	ASP 512	HIS 434	HIS 429	NITRITE 2 REDUCTASE
1YQ2	2_poor	GLU 553	HIS 557	HIS 335	BETA-GALACTOSIDASE
2DZN	2_poor	ASP 137	HIS 112	HIS 145	NAS6P
3BL5	2_poor	GLU 26	HIS 116	HIS 155	QUEC
2DEB	2_poor	ASP 346	HIS 340	HIS 344	CARNITINE PALMITOYLTRANSFERASE 2
3FHA	2_poor	GLU 453	HIS 420	HIS 454	ENDO-BETA-N-ACETYLGLUCOSAMINIDASE A
3EZ8	2_poor	ASP 488	HIS 507	HIS 461	ENDOGLUCANASE CEL9A
3M00	2_poor	GLU 152	HIS 155	HIS 199	5-EPI-ARISTOLOCHENE SYNTHASE
2EXH	2_poor	GLU 534	HIS 389	HIS 387	BETA-XYLOSIDASE
1HP5	2_poor	ASP 191	HIS 250	HIS 188	BETA-N-ACETYLHEXOSAMINIDASE
1N61	2_poor	ASP 439	HIS 753	HIS 754	CU,MO-CO DEHYDROGENASE
1T2A	2_poor	GLU 99	HIS 51	HIS 83	GDP-D-MANNOSE 4,6-DEHYDRATASE
3BXO	2_poor	GLU 179	HIS 181	HIS 168	N,N-dimethyltransferase
1IU4	2_poor	GLU 28	HIS 289	HIS 274	TRANSGLUTAMINASE
3GL5	2_poor	ASP 170	HIS 102	HIS 106	DSBA OXIDOREDUCTASE
2GMH	2_poor	ASP 295	HIS 426	HIS 269	ELECTRON TRANSFER FLAVOPROTEIN
1I7L	2_poor	GLU 197	HIS 275	HIS 273	C DOMAIN 2 OF SYNAPSIN II
3A25	2_poor	GLU 115	HIS 222	HIS 224	TYW2
1XQV	2_poor	GLU 213	HIS 181	HIS 271	PROLINE IMINOPEPTIDASE
2J14	2_poor	ASP 347	HIS 389	HIS 384	PEROXISOME PROLIF.-ACTIV. RECEPTOR DELTA
1XI8	2_poor	GLU 325	HIS 308	HIS 313	MO-COFACTOR BIOSYNTHESIS PROTEIN
2YZA	2_poor	ASP 196	HIS 131	HIS 137	KINASE DOMAIN
1T8P	2_poor	GLU 13	HIS 188	HIS 11	BISPHOSPHOGLYCERATE MUTASE
2KFP	2_poor	ASP 63	HIS 90	HIS 85	UNKNOWN FUNCTION
1YCS	2_poor	ASP 390	HIS 365	HIS 398	P53-53BP2 COMPLEX
1IKN	2_poor	GLU 153	HIS 193	HIS 188	IKAPPABALPHA/NF-KAPPAB COMPLEX
1RJL	2_poor	GLU 50	HIS 52	HIS 59	OSPB-CT
2PLR	2_poor	ASP 70	HIS 67	HIS 46	DTMP KINASE
1MM5	2_poor	GLU 22	HIS 23	HIS 165	ENZYME PAGP
1OO9	2_poor	GLU 202	HIS 201	HIS 205	MMP-3 CATALYTIC DOMAIN
1BD8	2_poor	ASP 104	HIS 79	HIS 112	CDK INHIBITOR P19INK4D
1AWC	2_poor	ASP 101	HIS 76	HIS 109	GABP ALPHA/BETA DOMAIN BOUND TO DNA
2QM8	2_poor	GLU 286	HIS 285	HIS 289	HOMOLOG OF MMAA
2ICH	2_poor	GLU 328	HIS 94	HIS 107	UNKNOWN FUNCTION
1Y0S	2_poor	ASP 383	HIS 425	HIS 420	PPAR DELTA COMPLEXED WITH GW2331
1MSW	2_poor	ASP 787	HIS 811	HIS 784	T7 RNA POLYMERASE
1HXA	2_poor	GLU 152	HIS 155	HIS 199	TEAS W273S
3KHK	2_poor	ASP 322	HIS 379	HIS 383	TYPE-I RESTRICTION-MODIFICATION SYSTEM
3HDA	2_poor	GLU 189	HIS 188	HIS 192	METZINCIN
3M4X	2_poor	GLU 87	HIS 57	HIS 82	RIBOSOMAL METHYLTRANSFERASE
1U2Z	2_poor	ASP 344	HIS 343	HIS 347	HISTONE K79 METHYLTRANSFERASE
1C3U	2_poor	GLU 309	HIS 305	HIS 219	ADENYLOSUCCINATE LYASE
3IEL	2_poor	ASP 250	HIS 324	HIS 323	Ribonuclease TTHA0252
3CW2	2_poor	GLU 131	HIS 17	HIS 132	TRANSLATION 2 INITIATION FACTOR
1CGT	2_poor	ASP 229	HIS 140	HIS 233	CYCLODEXTRIN GLYCOSYLTRANSFERASE
1FG5	2_poor	ASP 235	HIS 234	HIS 238	GALACTOSYLTRANSFERASE 2 CATALYTIC DOMAIN.
3DJ5	2_poor	ASP 324	HIS 267	HIS 261	AURORA-A CATALYTIC DOMAIN
1HG4	2_poor	ASP 403	HIS 443	HIS 448	ULTRASPIRACLE LIGAND BINDING DOMAIN
3K6R	2_poor	GLU 115	HIS 222	HIS 224	PUTATIVE TRANSFERASE PH0793
1TQJ	2_poor	GLU 177	HIS 35	HIS 68	D-RIBULOSE 5-PHOSPHATE 3-EPIMERASE 2
2ZVR	2_poor	GLU 39	HIS 208	HIS 206	D-TAGATOSE 3-EPIMERASE
1Q3B	2_poor	GLU 48	HIS 46	HIS 57	DNA REPAIR ENZYME ENDONUCLEASE- 2
3NAZ	2_poor	GLU 12	HIS 166	HIS 168	GLYCOGEN SYNTHASE
1SVX	2_poor	ASP 110	HIS 85	HIS 118	ANKYRIN
2JAK	2_poor	GLU 307	HIS 255	HIS 264	PP2A REGULATORY SUBUNIT B56G
2O7R	2_poor	ASP 137	HIS 64	HIS 130	CARBOXYLESTERASE
2BW0	2_poor	GLU 22	HIS 18	HIS 24	HYDROLASE DOMAIN
2P01	2_poor	GLU 294	HIS 268	HIS 290	RECEPTOR-ASSOCIATED PROTEIN(RAP)
2WZR	2_poor	ASP 166	HIS 174	HIS 168	FOOT IN MOUTH DISEASE VIRUS SEROTYPE SAT1
2KXG	2_poor	GLU 68	HIS 67	HIS 64	ASPARTIC ACID PROTEINASE 2 INHIBITOR
2P3Q	2_poor	ASP 255	HIS 53	HIS 52	DENGUE METHYLTRANSFERASE
3CZQ	2_poor	ASP 32	HIS 211	HIS 207	PUTATIVE POLYPHOSPHATE KINASE
2H1F	2_poor	GLU 196	HIS 185	HIS 193	HEPTOSYLTRANSFERASE WAAC
2ISN	2_poor	GLU 90	HIS 68	HIS 64	PHOSPHATASE
2PQ0	2_poor	GLU 93	HIS 95	HIS 99	HYOPTHETICAL PROTEIN
2GZO	2_poor	ASP 122	HIS 87	HIS 154	UNKNOWN FUNKTION
1TVI	2_poor	GLU 113	HIS 106	HIS 102	ZN-METALLOPROTEASE LIKE
2KG7	2_poor	GLU 678	HIS 677	HIS 615	VIRULENCE FACTORS RV0287 AND RV0288
2VNI	2_poor	ASP 216	HIS 200	HIS 199	FERREDOXIN-NADP(H) REDUCTASE
2AGA	2_poor	GLU 15	HIS 11	HIS 22	ATAXIN-3: THE JOSEPHIN DOMAIN
3GNU	2_poor	ASP 158	HIS 159	HIS 101	TOXIN FOLD
3DR6	2_poor	GLU 16	HIS 20	HIS 88	PUTATIVE ACETYLTRANSFERASE
1L2M	2_poor	ASP 77	HIS 86	HIS 88	THE N-TERMINAL, DNA-BINDING 2 DOMAIN
2GT1	2_poor	GLU 196	HIS 185	HIS 193	HEPTOSYLTRANSFERASE
2RHY	2_poor	ASP 491	HIS 488	HIS 482	3-MBT REPEATS FROM HUMAN L3MBTL1
1S70	2_poor	ASP 103	HIS 78	HIS 111	PHOSPHATASE-1:MYOSIN PHOSPHATASE complex
1TEX	2_poor	ASP 59	HIS 177	HIS 183	SULFOTRANSFERASE
3ISM	2_poor	ASP 170	HIS 162	HIS 165	THE ENDOG/ENDOGI COMPLEX
2KDY	2_poor	GLU 143	HIS 144	HIS 109	VACCINE CANDIDATE LP2086.
2VKC	2_poor	GLU 1668	HIS 1671	HIS 1697	THE B3BP SMR DOMAIN
2CRM	2_poor	ASP 80	HIS 33	HIS 31	THE FORTH FNIII DOMAIN OF HUMAN
1HCE	2_poor	GLU 105	HIS 107	HIS 90	HISACTOPHILIN
2KKP	2_poor	GLU 101	HIS 79	HIS 83	THE PHAGE INTEGRASE SAM-LIKE 2 DOMAIN
1AUZ	2_poor	ASP 56	HIS 23	HIS 24	SPOIIAA
2GU9	2_poor	ASP 60	HIS 80	HIS 62	PUTATIVE POLYKETIDE SYNTHESIS PROTEIN
2O3D	2_poor	ASP 139	HIS 140	HIS 183	SF2/ASF RNA RECOGNITION MOTIF
1WG0	2_poor	ASP 137	HIS 112	HIS 145	NAS6P PROTEIN
2FIN	2_poor	GLU 19	HIS 22	HIS 132	CHEMOKINE INHIBITOR: MIP-1BETA COMPLEX
2L3J	2_poor	GLU 230	HIS 234	HIS 235	ADAR2 DSRBM-RNA COMPLEX
2VGE	2_poor	ASP 690	HIS 665	HIS 698	THE C-TERMINAL REGION OF HUMAN IASPP
1G6N	2_poor	GLU 396	HIS 321	HIS 319	CAP-CAMP
1AP7	2_poor	ASP 106	HIS 81	HIS 114	P19-INK4D
1AU7	2_poor	GLU 130	HIS 123	HIS 119	PIT-1 MUTANT/DNA COMPLEX
2DE3	2_poor	ASP 246	HIS 162	HIS 166	DSZB
1PFF	2_poor	ASP 294	HIS 295	HIS 279	HOMOCYSTEINE ALPHA-, GAMMA-LYASE
1TND	2_poor	GLU 241	HIS 240	HIS 244	TRANSDUCIN-ALPHA
3D3Z	2_poor	GLU 64	HIS 110	HIS 115	ACTIBIND A T2 RNASE
1I87	2_poor	GLU 38	HIS 39	HIS 63	HEPATIC APOCYTOCHROME B5
2L3U	2_poor	ASP 89	HIS 93	HIS 94	YBBR FAMILY PROTEIN
2JOW	2_poor	GLU 77	HIS 78	HIS 80	TYPE III 2 SECRETION NEEDLE PROTEINS
2KA4	2_poor	ASP 794	HIS 793	HIS 797	CBP-TAZ1/STAT2-TAD COMPLEX
1NUI	2_poor	GLU 240	HIS 246	HIS 242	PRIMASE FRAGMENT
1X0R	2_poor	GLU 119	HIS 117	HIS 123	THIOREDOXIN PEROXIDASE
3CJ8	2_poor	GLU 168	HIS 142	HIS 144	CARBOXYLATE N-SUCCINYLTRANSFERASE
2VVH	2_poor	ASP 222	HIS 217	HIS 74	IRISFP FLUORESCENT PROTEIN
3HNK	2_poor	ASP 74	HIS 73	HIS 77	CYT CB562 2 VARIANT RIDC-1
3KSY	2_poor	GLU 487	HIS 460	HIS 475	HISTONE DOMAIN
2JE5	2_poor	ASP 428	HIS 584	HIS 581	PENICILLIN BINDING 2 PROTEIN
2BPL	2_poor	GLU 39	HIS 64	HIS 41	GLUCOSAMINE-6P SYNTHASE
1RT8	2_poor	ASP 334	HIS 358	HIS 363	ACTIN-CROSSLINKING CORE
2IQH	2_poor	GLU 339	HIS 272	HIS 334	INFLUENZA A VIRUS NUCLEOPROTEIN
2XD5	2_poor	ASP 428	HIS 584	HIS 581	PBP1B
2IVD	2_poor	GLU 267	HIS 268	HIS 246	PROTOPORPHYRINOGEN OXIDASE
3CK6	2_poor	ASP 9	HIS 29	HIS 7	ZNTB CYTOPLASMIC DOMAIN
2ISS	2_poor	GLU 14	HIS 15	HIS 170	PLP SYNTHASE HOLOENZYME
1GJV	3_pocket viable	GLU 118	HIS 177	HIS 181	ALPHA-KETOACID DEHYDROGENASE KINASE
3LOU	3_pocket viable	GLU 236	HIS 228	HIS 199	FORMYLTETRAHYDROFOLATE DEFORMYLASE 2
2W4Y	3_pocket viable	GLU 60	HIS 89	HIS 62	VIRUS-LIKE PARTICLE
3D53	3_pocket viable	ASP 114	HIS 76	HIS 77	INORGANIC PYROPHOSPHATASE
3A27	3_pocket viable	GLU 86	HIS 193	HIS 195	TYW2 IN COMPLEX WITH 2 ADOMET
2F99	3_pocket viable	ASP 121	HIS 107	HIS 119	POLYKETIDE CYCLASE AKNH
1JSY	3_pocket viable	ASP 290	HIS 353	HIS 210	ARRESTIN-2
1ACO	3_surface viable	ASP 695	HIS 717	HIS 692	ACONITASE
2OZ3	3_surface viable	GLU 197	HIS 181	HIS 182	L-RHAMNON ATE DEHYDRATASE
2GYY	3_surface viable	GLU 167	HIS 198	HIS 186	ASPARTATE SEMIALDEHYDE DEHYDROGENASE
1RHY	3_surface viable	GLU 171	HIS 167	HIS 45	IMIDAZ. GLYCEROL PHOSPHATE 2 DEHYDRATASE
2PMQ	3_surface viable	ASP 90	HIS 86	HIS 274	MANDELATE RACEMASE
3IMH	3_surface viable	GLU 86	HIS 83	HIS 88	GALACTOSE 1-EPIMERASE
1RVK	3_surface viable	ASP 20	HIS 18	HIS 26	ENOLASE AGR_L_2751
1O0Q	3_surface viable	GLU 170	HIS 169	HIS 173	COLD ADAPTED ALKALINE PROTEASE
1CEM	3_surface viable	ASP 144	HIS 143	HIS 133	ENDOGLUCANASE
1DO0	3_surface viable	ASP 300	HIS 301	HIS 46	HEAT SHOCK LOCUS U
3NBN	3_surface viable	GLU 192	HIS 190	HIS 197	NOTCH TRANSCRIPTION
3N7X	3_surface viable	GLU 294	HIS 47	HIS 292	PENAEUS STYLIROSTRIS DENSOVIRUS CAPSID
1BI1	3_surface viable	GLU 83	HIS 79	HIS 98	APO-AND HOLO-DIPHTHERIA TOXIN REPRESSOR
1OCC	3_surface viable	GLU 236	HIS 232	HIS 148	HEART CYTOCHROME C OXIDASE
1JA0	3_surface viable	GLU 304	HIS 470	HIS 302	NADPH-Cytochrome P450 Oxidoreductase
1DAR	3_surface viable	GLU 364	HIS 362	HIS 359	ELONGATION FACTOR
1FPZ	3_surface viable	GLU 121	HIS 106	HIS 104	KINASE ASSOCIATED PHOSPHATASE 2
1Z33	3_surface viable	GLU 210	HIS 208	HIS 205	PURINE 2 NUCLEOSIDE PHOSPHORYLASE
1J70	3_surface viable	ASP 168	HIS 236	HIS 235	ATP SULFURYLASE
1URJ	3_surface viable	GLU 449	HIS 450	HIS 122	SINGLE STRANDED DNA-BINDING PROTEIN
3B77	3_surface viable	GLU 104	HIS 86	HIS 109	UNKNOWN FUNCTION
2RJD	3_surface viable	ASP 491	HIS 488	HIS 482	L3MBTL1 PROTEIN
1UAN	3_surface viable	ASP 110	HIS 111	HIS 10	UNKNOWN FUNKTION
2DO8	3_surface viable	GLU 140	HIS 31	HIS 137	UNKNOWN FUNKTION
2KCQ	3_surface viable	ASP 96	HIS 88	HIS 85	UNKNOWN FUNKTION
1LXJ	3_surface viable	GLU 65	HIS 64	HIS 68	UNKNOWN FUNKTION
1J9Z	3_surface viable	GLU 304	HIS 470	HIS 302	NADPH-cytochrome P450 oxidoreductase
1ZXJ	3_surface viable	GLU 80	HIS 79	HIS 83	UNKONOWN FUNCTION
1YOY	3_surface viable	ASP 75	HIS 74	HIS 42	UNKONOWN FUNCTION
1XW8	3_surface viable	GLU 11	HIS 33	HIS 57	PUTATIVE LACTAM UTILIZATION PROTEIN
1Z8M	3_surface viable	GLU 58	HIS 60	HIS 47	UNKONOWN FUNCTION
1OGY	3_surface viable	ASP 404	HIS 616	HIS 614	NITRATE REDUCTASE
2QLC	3_surface viable	GLU 25	HIS 75	HIS 77	DNA REPAIR PROTEIN
1NUP	3_surface viable	ASP 81	HIS 100	HIS 99	ADENYLYLTRANSFERASE
1FNU	3_surface viable	GLU 33	HIS 110	HIS 106	PYROGENIC EXOTOXIN A
1OYX	3_surface viable	ASP 491	HIS 488	HIS 482	3-MBT REPEATS OF MALIGNANT 2 BRAIN TUMOR
2EHH	3_surface viable	GLU 83	HIS 82	HIS 86	DIHYDRODIPICOLINATE SYNTHASE
1V9A	3_surface viable	GLU 48	HIS 72	HIS 76	UROPORPHYRIN-III C-METHYL TRANSFERASE
1I5Z	3_surface viable	GLU 96	HIS 21	HIS 19	CRP-CAMP AT 1.9 A
1EHY	3_surface viable	GLU 13	HIS 22	HIS 11	EPOXIDE HYDROLASE
1QAX	3_surface viable	GLU 160	HIS 176	HIS 162	MEVALONII HMG-COA REDUCTASE
1KKQ	3_surface viable	ASP 374	HIS 416	HIS 411	HUMAN PPAR-ALPHA LIGAND-BINDING 2 DOMAIN
1B1Z	3_surface viable	GLU 33	HIS 110	HIS 106	EXOTOXIN A1
2Z90	3_surface viable	ASP 130	HIS 141	HIS 126	DPS
1ET6	3_surface viable	ASP 204	HIS 202	HIS 162	SUPERANTIGEN SMEZ-2
2ZA7	3_surface viable	GLU 54	HIS 50	HIS 174	L-CHAIN APOFERRITIN
1C04	3_surface viable	ASP 39	HIS 60	HIS 59	UNKONOWN FUNCTION
2NTS	3_surface viable	ASP 210	HIS 208	HIS 169	SUPERANTIGEN
1BM0	3_surface viable	ASP 249	HIS 247	HIS 67	SERUM ALBUMIN
2W0H	3_surface viable	GLU 275	HIS 267	HIS 269	TRYPANOTHIONE 2 REDUCTASE
2E0I	3_surface viable	GLU 146	HIS 137	HIS 136	PHOTOLYASE
3EZ9	3_surface viable	GLU 325	HIS 324	HIS 328	PARTITION PROTEIN
3FBS	3_surface viable	GLU 138	HIS 43	HIS 45	OXIDOREDUCTASE
3HB7	3_surface viable	GLU 56	HIS 58	HIS 71	ISOCHORISMATASE-LIKE HYDROLASE
1IJB	3_surface viable	GLU 557	HIS 559	HIS 563	VON WILLEBRAND FACTOR
1GZU	3_surface viable	ASP 83	HIS 102	HIS 101	ADENYLYLTRANSFERASE
3GGR	3_surface viable	GLU 268	HIS 267	HIS 15	RAD9-HUS1-RAD1 COMPLEX
1ZRH	3_surface viable	GLU 254	HIS 253	HIS 257	GLUCOSAMINE 3-O- 2 SULFOTRANSFERASE
3HXQ	3_surface viable	GLU 557	HIS 559	HIS 563	VON WILLEBRAND FACTOR
2W01	3_surface viable	GLU 517	HIS 482	HIS 481	GUANYLYL CYCLASE CYA2
1FNS	3_surface viable	GLU 557	HIS 559	HIS 563	VON WILLEBRAND FACTOR
2KFW	3_surface viable	ASP 165	HIS 164	HIS 160	FULL-LENGTH SLYD
1NED	3_surface viable	ASP 160	HIS 173	HIS 171	HSLV
3CO1	3_surface viable	GLU 70	HIS 69	HIS 73	MICROTUBULE BINDING DOMAIN
1HPC	3_surface viable	ASP 128	HIS 34	HIS 30	LIPOAMIDE-CONTAINING PROTEIN
2KZX	3_surface viable	ASP 48	HIS 127	HIS 126	UNKONOWN FUNCTION
2AVG	3_surface viable	GLU 73	HIS 60	HIS 75	CARDIAC MYOSIN 2 BINDING PROTEIN C
2KHQ	3_surface viable	GLU 58	HIS 34	HIS 38	PHAGE INTEGRASE SSP1947 2 FRAGMENT
2DM4	3_surface viable	ASP 9	HIS 37	HIS 35	SECOND FN3 DOMAIN OF HUMAN 2 SORLA/LR11
2L0R	3_surface viable	GLU 65	HIS 20	HIS 16	ANTHRAX LETHAL FACTOR CATALYTIC CENTER
1PCG	3_surface viable	ASP 374	HIS 373	HIS 377	STEROID RECEPTOR
1ZHO	3_surface viable	GLU 42	HIS 44	HIS 172	RIBOSOMAL PROTEIN L1
2A9S	3_surface viable	GLU 137	HIS 123	HIS 135	COMPETENCE/DAMAGE INDUCIBLE PROTEIN
2I9Y	3_surface viable	GLU 27	HIS 136	HIS 138	PROTEIN 2 AT1G70830
3JVN	3_surface viable	ASP 25	HIS 24	HIS 28	ACETYLTRANSFERASE
1P2X	3_surface viable	GLU 118	HIS 121	HIS 112	CALPONIN-HOMOLOGY DOMAIN OF RNG2
1WYO	3_surface viable	GLU 77	HIS 76	HIS 80	MICROTUBULE- 2 ASSOCIATED PROTEIN RP/EB
2HX5	3_surface viable	GLU 104	HIS 114	HIS 102	PUTATIVE THIOESTERASE
2OFD	3_surface viable	ASP 58	HIS 18	HIS 56	LECTIN
3M1G	3_surface viable	ASP 96	HIS 298	HIS 303	GLUTATHIONE S-TRANSFERASE
2WZN	3_surface viable	ASP 83	HIS 81	HIS 89	TET3
2RHI	3_surface viable	ASP 491	HIS 488	HIS 482	3-MBT DOMAIN
1IZC	3_surface viable	ASP 83	HIS 82	HIS 86	MACROPHOMATE SYNTHASE
2RHU	3_surface viable	ASP 491	HIS 488	HIS 482	3-MBT REPEATS
3KN5	3_surface viable	GLU 486	HIS 445	HIS 422	C-TERMINAL KINASE DOMAIN
2C0Y	3_surface viable	GLU 50	HIS 56	HIS 47	PROCATHEPSIN S
3KCC	3_surface viable	GLU 96	HIS 21	HIS 19	CATABOLITE GENE 2 ACTIVATOR PROTEIN
2GAQ	3_surface viable	GLU 11	HIS 10	HIS 14	FRB DOMAIN OF MTOR
2EE9	3_surface viable	GLU 69	HIS 37	HIS 71	FILAMIN DOMAIN FROM HUMAN 2 FILAMIN-B
2EE1	3_surface viable	ASP 23	HIS 29	HIS 27	CHROMO DOMAIN
2J8P	3_surface viable	GLU 558	HIS 529	HIS 535	C-TERMINAL DOMAIN OF HUMAN CSTF-64
1AMO	3_surface viable	GLU 304	HIS 470	HIS 302	NADPH-CYTOCHROME P450 2 REDUCTASE
1Q40	3_surface viable	ASP 89	HIS 91	HIS 102	MTR2-MEX67 M DOMAIN 2 COMPLEX
1N0S	3_surface viable	ASP 126	HIS 124	HIS 4	LIPOCALIN
1NSG	3_surface viable	GLU 2025	HIS 2024	HIS 2028	FKBP12-RAPAMYCIN COMPLEX
1PSB	3_surface viable	GLU 86	HIS 85	HIS 90	REGULATORY DOMAIN OF NDR KINASE.
3B43	3_surface viable	ASP 397	HIS 399	HIS 439	TITIN
2H5E	3_surface viable	ASP 313	HIS 368	HIS 311	POLYPEPTIDE RELEASE
2FO1	3_surface viable	GLU 411	HIS 409	HIS 416	CSL-NOTCH-MASTERMIND TERNARY 2 COMPLEX
3IKL	3_surface viable	GLU 310	HIS 309	HIS 313	POL GB DELTA-I4.
2DH2	3_surface viable	ASP 439	HIS 441	HIS 455	ED-4F2HC
1CHW	3_surface viable	ASP 255	HIS 257	HIS 266	CHALCONE SYNTHASE
1U0V	3_surface viable	ASP 255	HIS 257	HIS 266	STILBENE SYNTHASE
1DDG	3_surface viable	GLU 260	HIS 402	HIS 258	SULFITE REDUCTASE
1VYW	3_surface viable	GLU 180	HIS 179	HIS 183	CDK2/CYCLIN
2X0O	3_surface viable	ASP 336	HIS 437	HIS 442	ALCALIGIN BIOSYNTHESIS PROTEIN C
1B0K	3_surface viable	ASP 695	HIS 692	HIS 717	ACONITASE
2QB5	3_surface, his tag	GLU 205	HIS -2	HIS -4	INOSITOL 1,3,4-TRISPHOSPHATE 5/6- 2 KINASE
3DBY	3_surface, his tag	GLU 215	HIS 265	HIS 263	UNKONOWN FUNCTION
1G0F	3_surface, his tag	ASP 19	HIS 4	HIS 3	CARBONIC ANHYDRASE II
3KTG	3_surface, his tag	GLU 58	HIS 197	HIS 196	CLPP
3I18	3_surface, his tag	ASP 92	HIS 98	HIS 100	SDRC-LIKE PROTEIN
1VME	3_surface, his tag	ASP 23	HIS -2	HIS 0	FLAVOPROTEIN
